# Supplementary material for: Orthogonally spin-labeled rulers help to identify crosstalk signals and improve DEER signal fidelity
Source: Copernicus journal article supplement (doi:10.5194/mr-2020-15), 2020-06-23
Supplement: Supplementary file 3 [file mr-2020-15-supplement.zip]

Archive with 2 entries (2 files):
- Supplementary Material/cross_talk_paper_SI_Part_A.pdf
- Supplementary Material/cross_talk_paper_SI_Part_B.pdf
